# Supplementary material for: A glycolysis-related lncRNAs signature for predicting prognosis and evaluating the tumor immune microenvironment of cutaneous melanoma
Source: Research Square preprint supplement (doi:10.21203/rs.3.rs-6618188/v1), 2025-06-02
Supplement: Supplementary file 1 [file ba30f02882f800d2488d5b40.xlsx]

## Sheet: Supplementary Table S1
	glycolysis-related genes
1	GCLC
2	FKBP4
3	SLC25A13
4	SLC4A1
5	ALDH3B1
6	TKTL1
7	MED24
8	MLXIPL
9	DCN
10	PSMC4
11	MDH1
12	XYLT2
13	IGF1
14	DEPDC1
15	RRAGD
16	CD44
17	B4GALT7
18	NUP160
19	ALG1
20	CHPF2
21	FUT8
22	VCAN
23	PHKA2
24	HSPA5
25	TPR
26	PKP2
27	NDC1
28	SPAG4
29	GPC1
30	ME1
31	PFKP
32	PKM
33	PDK3
34	HDAC4
35	KIF2A
36	NUP133
37	PRKACA
38	ALDH3A2
39	HMMR
40	P4HA2
41	ENO1
42	NUP37
43	GPC4
44	SIRT6
45	TIGAR
46	PGM1
47	SLC4A4
48	PSEN1
49	ME2
50	PLOD1
51	GCKR
52	SEH1L
53	B4GALT1
54	AURKA
55	P2RX7
56	DLD
57	NUP50
58	AAAS
59	NUP188
60	KDELR3
61	MIOX
62	BIK
63	EP300
64	PYGL
65	HIF1A
66	PCK2
67	PYGB
68	RAE1
69	PGK1
70	HTR2A
71	NUP93
72	GFUS
73	PPP2CB
74	GYS1
75	GPI
76	PPP2R1A
77	GAPDHS
78	OGDH
79	MET
80	PRKAG2
81	GCK
82	LIPA
83	LHPP
84	GIT1
85	GALK1
86	ENO3
87	NUP88
88	ALDH3A1
89	ALDOC
90	B3GAT1
91	NUP98
92	ALDH2
93	IFNG
94	NUP107
95	GAPDH
96	TPI1
97	ENO2
98	GYS2
99	LDHB
100	PPP2R5D
101	VEGFA
102	KIF20A
103	GNPDA1
104	NUP155
105	PPP2CA
106	RARS1
107	STC2
108	FAM162A
109	KAT2B
110	PFKFB4
111	CENPA
112	PRKAG3
113	ABCB6
114	HDLBP
115	LCT
116	SDC1
117	QSOX1
118	CTH
119	GALE
120	ARTN
121	B4GALT2
122	AKR1A1
123	SLC35A3
124	STMN1
125	MXI1
126	GOT1
127	NUP43
128	TGFBI
129	B4GALT4
130	CXCR4
131	ECD
132	P4HA1
133	PFKFB2
134	CHPF
135	PCK1
136	NUP153
137	GOT2
138	SOX9
139	NUP85
140	RBCK1
141	NUP214
142	IDUA
143	SRD5A3
144	GAL3ST1
145	CLN6
146	ARPP19
147	EGLN3
148	CBFA2T3
149	PGLS
150	COL5A1
151	FBP2
152	ACSS2
153	IL13RA1
154	PDHA1
155	NUP210
156	PRKAA1
157	ALDH3B2
158	NASP
159	LDHA
160	DSC2
161	NT5E
162	COG2
163	CHST12
164	NUP42
165	TXN
166	ALDOB
167	ALDH1B1
168	IER3
169	SLC37A4
170	PPP2R1B
171	GPR87
172	IDH1
173	GLCE
174	NUP54
175	CASP6
176	NUP58
177	PMM2
178	CHST4
179	NOL3
180	NCOR1
181	SLC16A3
182	RPTOR
183	FOXK2
184	PFKL
185	SOD1
186	APP
187	PRKACB
188	ALDH9A1
189	SDHC
190	LHX9
191	ARNT
192	HAX1
193	EFNA3
194	PKLR
195	PPFIA4
196	GALM
197	GMPPA
198	PAM
199	TPBG
200	EGFR
201	IGFBP3
202	MDH2
203	OGT
204	PRPS1
205	GPC3
206	NSDHL
207	VLDLR
208	AK3
209	CAPN5
210	B3GAT3
211	ALDOA
212	DLAT
213	EXT2
214	DPYSL4
215	G6PC2
216	HOMER1
217	PFKM
218	PLOD2
219	RANBP2
220	MERTK
221	HS2ST1
222	FLCN
223	ACSS1
224	NUP205
225	HKDC1
226	HK1
227	GALK2
228	SEC13
229	PAXIP1
230	PRXL2C
231	PFKFB1
232	STC1
233	ADPGK
234	HK2
235	GNE
236	TFF3
237	NDUFV3
238	G6PD
239	SLC2A6
240	HK3
241	POLR3K
242	JMJD8
243	PRKAA2
244	AK4
245	SDC3
246	AGL
247	BPNT1
248	NUP35
249	PDHA2
250	TGFA
251	GNPDA2
252	ELF3
253	ANKZF1
254	NDST3
255	SAP30
256	CITED2
257	PGAM2
258	ALDH7A1
259	FOXK1
260	PRKACG
261	FBP1
262	CLDN3
263	PGM2L1
264	CYB5A
265	LDHC
266	LDHAL6A
267	GPD1
268	ANGPTL4
269	MLST8
270	DDIT4
271	PDHB
272	STAT3
273	PGM2
274	SDC2
275	UGP2
276	TPST1
277	GUSB
278	NANP
279	CDK1
280	ADORA2B
281	PFKFB3
282	PGK2
283	HS6ST2
284	INSR
285	PGAM1
286	LDHAL6B
287	ISG20
288	BPGM
289	ADH6
290	GLRX
291	GMPPB
292	PC
293	CHST2
294	CHST1
295	UCP2
296	B3GALT6
297	NUPR1
298	TALDO1
299	MPI
300	ZBTB7A
301	B3GNT3
302	DHTKD1
303	ZBTB20
304	PRKAG1
305	EXT1
306	SLC25A10
307	CHST6
308	PGP
309	ALDH1A3
310	COPB2
311	IRS2
312	PPARA
313	ADH1A
314	AGRN
315	ENO4
316	ZNF292
317	PPIA
318	POM121
319	ADH7
320	CACNA1H
321	ADH1B
322	OGDHL
323	RPE
324	ADH5
325	ERO1A
326	ADH4
327	GFPT1
328	MTOR
329	NUP62
330	ARL2
331	TREX1
332	CLDN9
333	ANG
334	PGAM4
335	MIF
336	EIF6
337	ADH1C
338	ACTN3
339	INS
340	POM121C
